# Supplementary material
Source: HighWire-hosted journal article supplement (https://bmjpaedsopen.bmj.com/content/7/1/e001987)
Supplement: inline-supplementary-material-1 [file inline-supplementary-material-1.pdf]

## Questionnaire “central precocious puberty”/ “early-onset puberty” during the COVID-19 pandemic 2020/2021 (date: 19.05.2021)

Response via e-mail: [bettina.gohlke@ukbonn.de](mailto:bettina.gohlke@ukbonn.de)

|                                                                                                                                                |     |    |
|------------------------------------------------------------------------------------------------------------------------------------------------|-----|----|
| Name of endocrinologist                                                                                                                        |     |    |
| E-mail-address of the hospital/medical institution                                                                                             |     |    |
| Number of endocrinological patients per 3 months                                                                                               |     |    |
| Did you notice a raise of cases of “central precocious puberty” during the first lockdown (spring 2020)? Please select an answer               | Yes | No |
| Did you notice a raise of cases of “central precocious puberty” during the second lockdown (winter 2020/ spring 2021)? Please select an answer | Yes | No |
| Did you notice a raise of cases of “early-onset puberty” during the first lockdown (spring 2020)? Please select an answer                      | Yes | No |
| Did you notice a raise of cases of “early-onset puberty” during the second lockdown (winter 2020/ spring 2021)? Please select an answer        | Yes | No |
| Quantification (if possible)                                                                                                                   |     |    |
| Number of patients diagnosed with “central precocious puberty” in 2019                                                                         |     |    |
| Number of patients diagnosed with “central precocious puberty” 01/2020 - 03/2020                                                               |     |    |
| Number of patients diagnosed with “central precocious puberty” 04/2020 – 06/2020                                                               |     |    |
| Number of patients diagnosed with “central precocious puberty” 07/2020 – 09/2020                                                               |     |    |
| Number of patients diagnosed with “central precocious puberty” 10/2020 – 12/2020                                                               |     |    |
| Number of patients diagnosed with “central precocious puberty” 01/2021 - 03/2021                                                               |     |    |
| Number of patients diagnosed with “central precocious puberty” 04/2021 – 06/2021                                                               |     |    |
| Number of patients diagnosed with “early-onset puberty” in 2019                                                                                |     |    |
| Number of patients diagnosed with “early-onset puberty” 01/2020 - 03/2020                                                                      |     |    |
| Number of patients diagnosed with “early-onset puberty” 04/2020 – 06/2020                                                                      |     |    |
| Number of patients diagnosed with “early-onset puberty” 07/2020 – 09/2020                                                                      |     |    |
| Number of patients diagnosed with “early-onset puberty” 10/2020 – 12/2020                                                                      |     |    |
| Number of patients diagnosed with “early-onset puberty” 01/2021 - 03/2021                                                                      |     |    |
| Number of patients diagnosed with “early-onset puberty” 04/2021 - 06/2021                                                                      |     |    |

Comments:

---



---
